# Supplementary material for: Toward nanofabrication of SERS substrates with two-photon polymerization
Source: Royal Society of Chemistry journal article supplement (doi:10.1039/d4na00742e), 2024-12-17
Supplement: d4na00742e1.pdf [file d4na00742e1.pdf]

## Title: Development of two-photon polymerized (2PP) periodic nanostructures for label-free SERS biosensing

Tatevik Chalyan<sup>1,\*§</sup>, Mehdi Feizpour<sup>1,§</sup>, Qing Liu<sup>1,§</sup>, Koen Vanmol<sup>1</sup>, Núria Solerdelcoll<sup>1</sup>, Gen Takebe<sup>1,2</sup>, Hugo Thienpont<sup>1</sup>, Heidi Ottevaere<sup>1</sup>

<sup>1</sup>Brussels Photonics (B-PHOT), Department of Applied Physics and Photonics, Vrije Universiteit Brussel and Flanders Make, Pleinlaan 2, B-1050 Brussels, Belgium

<sup>2</sup>Central Research Laboratory, Hamamatsu Photonics K.K., 5000, Hirakuchi, Hamana-ku, Hamamatsu City, Shizuoka Pref., Japan

<sup>§</sup>These authors contributed equally to the work

\*Corresponding author: tatevik.chalyan@vub.be

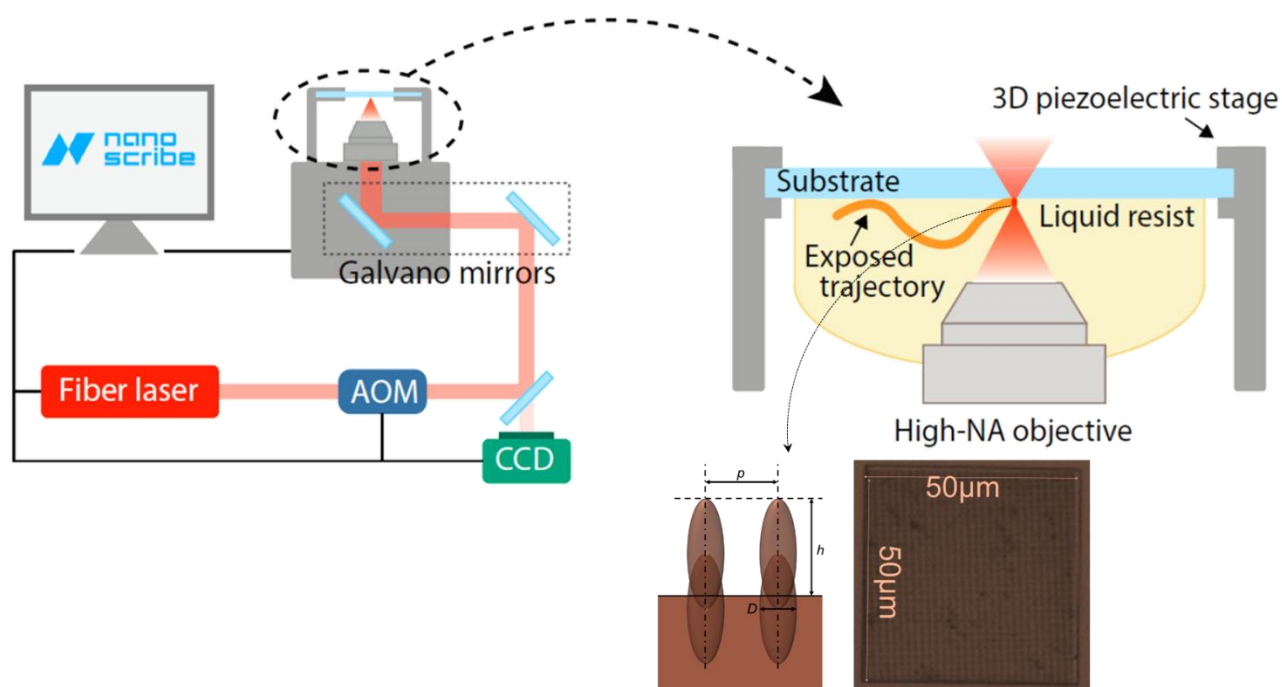

Fig. 1 Schematic demonstration of the 2PP fabrication process.

| Designed Pitch         | 300    |        | 400     |         | 600    |           |  |
|------------------------|--------|--------|---------|---------|--------|-----------|--|
|                        | 100    | 300    | 400     | 600     | 400    | 600       |  |
| Designed Height (H)    | 100    | 300    | 400     | 600     | 400    | 600       |  |
| Measured Pitch in X    | 300±20 | 315±2  | 340±10  | 320±5   | 590±40 |           |  |
| Measured Pitch in Y    | 300±20 | 315±2  | 400±150 | 450±175 | 585±5  |           |  |
| Measured Height in X   | 75±30  | 65±15  | 150±20  | 160±20  | 610±5  | Collapsed |  |
| Measured Height in Y   | 115±20 | 125±10 | 350±150 | 530±200 | 675±5  |           |  |
| Measured Diameter in X | 250±15 | 235±5  | 350±5   | 335±15  | 420±20 |           |  |
| Measured Diameter in Y | 235±5  | 235±5  | 330±20  | 335±15  | 355±5  |           |  |

Table 1. Measured characteristics for single-voxel-based structures. X and Y represent horizontal and vertical cross-sections of 3D AFM measurements. All values are in *nm* units.

| De-<br>signed<br>Diame-<br>ter                        | 250        |                     |             |                     | 300           |                    |                     |                     | 400                 |     |     |
|-------------------------------------------------------|------------|---------------------|-------------|---------------------|---------------|--------------------|---------------------|---------------------|---------------------|-----|-----|
|                                                       | 300        | 350                 | 380         |                     | 300           | 350                | 380                 |                     | 300                 | 350 | 380 |
| De-<br>signed<br>Pitch                                | 300        | 350                 | 380         |                     | 300           | 350                | 380                 |                     | 300                 | 350 | 380 |
| <i>Measured parameters for P=12 mW laser power</i>    |            |                     |             |                     |               |                    |                     |                     |                     |     |     |
| Height                                                |            |                     |             |                     |               |                    | 30±1<br>0           | 63±4                | 70±1<br>0           |     |     |
| Diame-<br>ter                                         |            |                     |             |                     |               |                    | 210±<br>5           | 210±<br>5           | 280±<br>10          |     |     |
| Pitch                                                 |            |                     |             |                     |               |                    | 320±<br>20          | 400±<br>50          | 430±<br>20          |     |     |
| <i>Measured parameters for P=14.25 mW laser power</i> |            |                     |             |                     |               |                    |                     |                     |                     |     |     |
| Height                                                | 55±<br>5   | 55±<br>2            | 60±<br>5    | 175±1<br>5          | 225±10        | 190±1<br>0         | 320±<br>10          | 390±<br>5           | 390±<br>10          |     |     |
| Diame-<br>ter                                         | 210±<br>10 | 220±<br>10          | 210<br>±10  | 220±1<br>0          | 220±10        | 220±1<br>0         | 255±<br>5           | 265±<br>5           | 280±<br>5           |     |     |
| Pitch                                                 | 285±<br>25 | 340±<br>5           | 380<br>± 10 | 320±<br>10          | 350± 10       | 360±<br>15         | 390±<br>15          | 425±<br>10          | 485±<br>15          |     |     |
| <i>Measured parameters for P=15 mW laser power</i>    |            |                     |             |                     |               |                    |                     |                     |                     |     |     |
| Height                                                | 165±<br>15 | 215±<br>15          | 190<br>±10  | <b>345±2<br/>0</b>  | <b>325±20</b> | <b>390±1<br/>0</b> | <u>300±<br/>100</u> | 465±<br>5           | 485±<br>10          |     |     |
| Diame-<br>ter                                         | 185±<br>15 | 230±<br>5           | 230<br>±5   | <b>260±5</b>        | <b>250±10</b> | <b>265±1<br/>0</b> | 305±<br>10          | 250±<br>10          | 335±<br>10          |     |     |
| Pitch                                                 | 260±<br>10 | 330±<br>30          | 390<br>±15  | <b>330±3<br/>0</b>  | <b>375±5</b>  | <b>390±2</b>       | 375±<br>5           | 430±<br>20          | 455±<br>15          |     |     |
| <i>Measured parameters for P=16.5 mW laser power</i>  |            |                     |             |                     |               |                    |                     |                     |                     |     |     |
| Height                                                | 220±<br>80 | <u>250±<br/>100</u> | 350<br>±10  | <u>270±<br/>100</u> | 450±<br>50    | 445±<br>5          | <u>400±<br/>150</u> | <u>450±<br/>150</u> | <u>550±<br/>100</u> |     |     |
| Diame-<br>ter                                         | 250±<br>10 | 260±<br>10          | 260<br>±10  | 270±<br>10          | 310±<br>10    | 315±<br>5          | 330±<br>10          | 360±<br>10          | 360±<br>10          |     |     |
| Pitch                                                 | 270±<br>50 | 310±<br>30          | 350<br>±30  | <u>350±<br/>150</u> | 385± 5        | 390±<br>20         | <u>400±<br/>130</u> | 420±<br>30          | 450±<br>10          |     |     |

Table 2. Characteristics for nanostructures fabricated in the multilayer voxel mode. The most inhomogeneous substrates are underlined. In bold are the parameters used for the final fabrication. All values are in nm units.

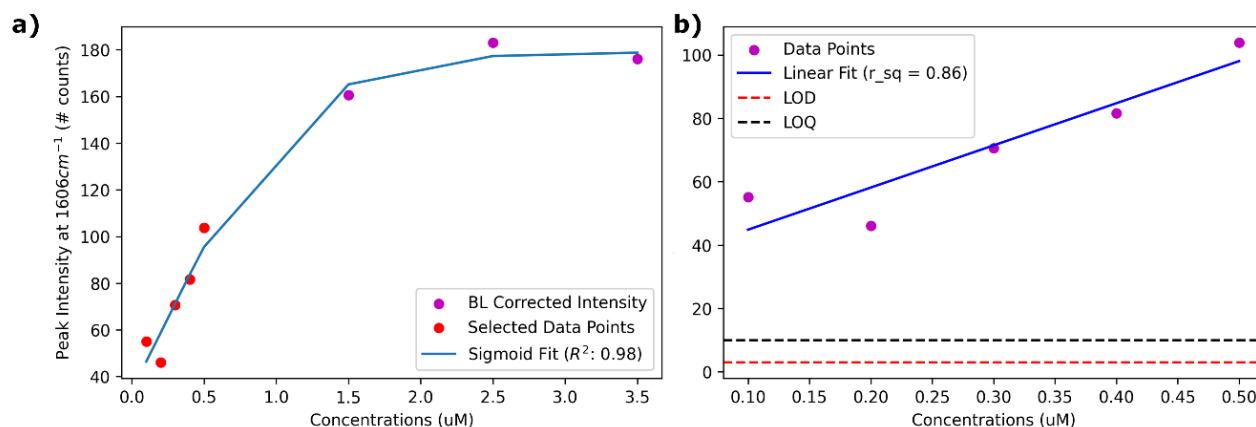

Fig. 2. The 1606 cm⁻¹ peak intensity versus BPE concentration i.e. calibration plot for a Collapsed Single-Voxel (a). The “selected data points” refer to the points selected for the calculation of the limit of detection (b).

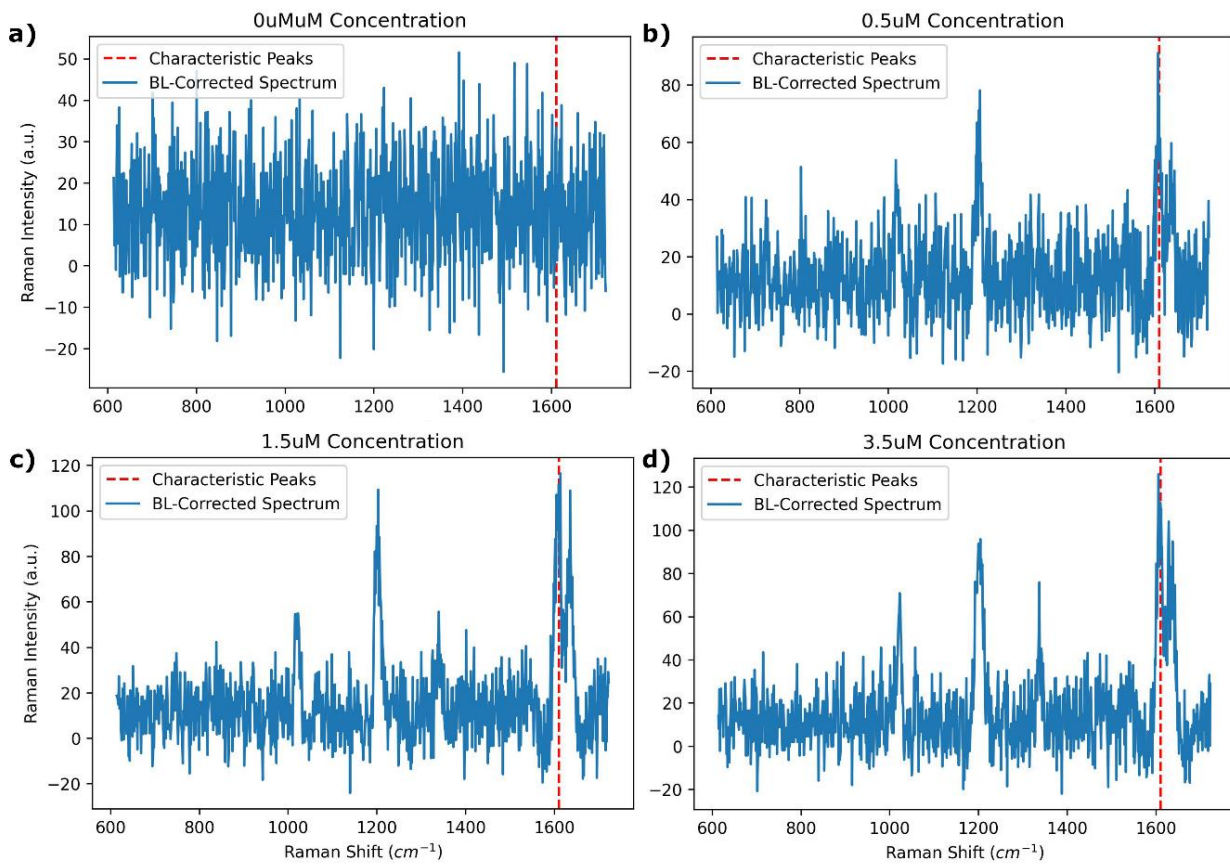

Fig. 3. The evolution of the BPE spectrum with increasing BPE concentration for a Collapsed Single-Voxel. The concentrations are 0 i.e. no analyte (a), 0.5  $\mu\text{M}$  (b), 1.5  $\mu\text{M}$  (c), and 3.5  $\mu\text{M}$  (d).
